# Supplementary material
Source: PubMed Central journal article supplement (PMC2712262)

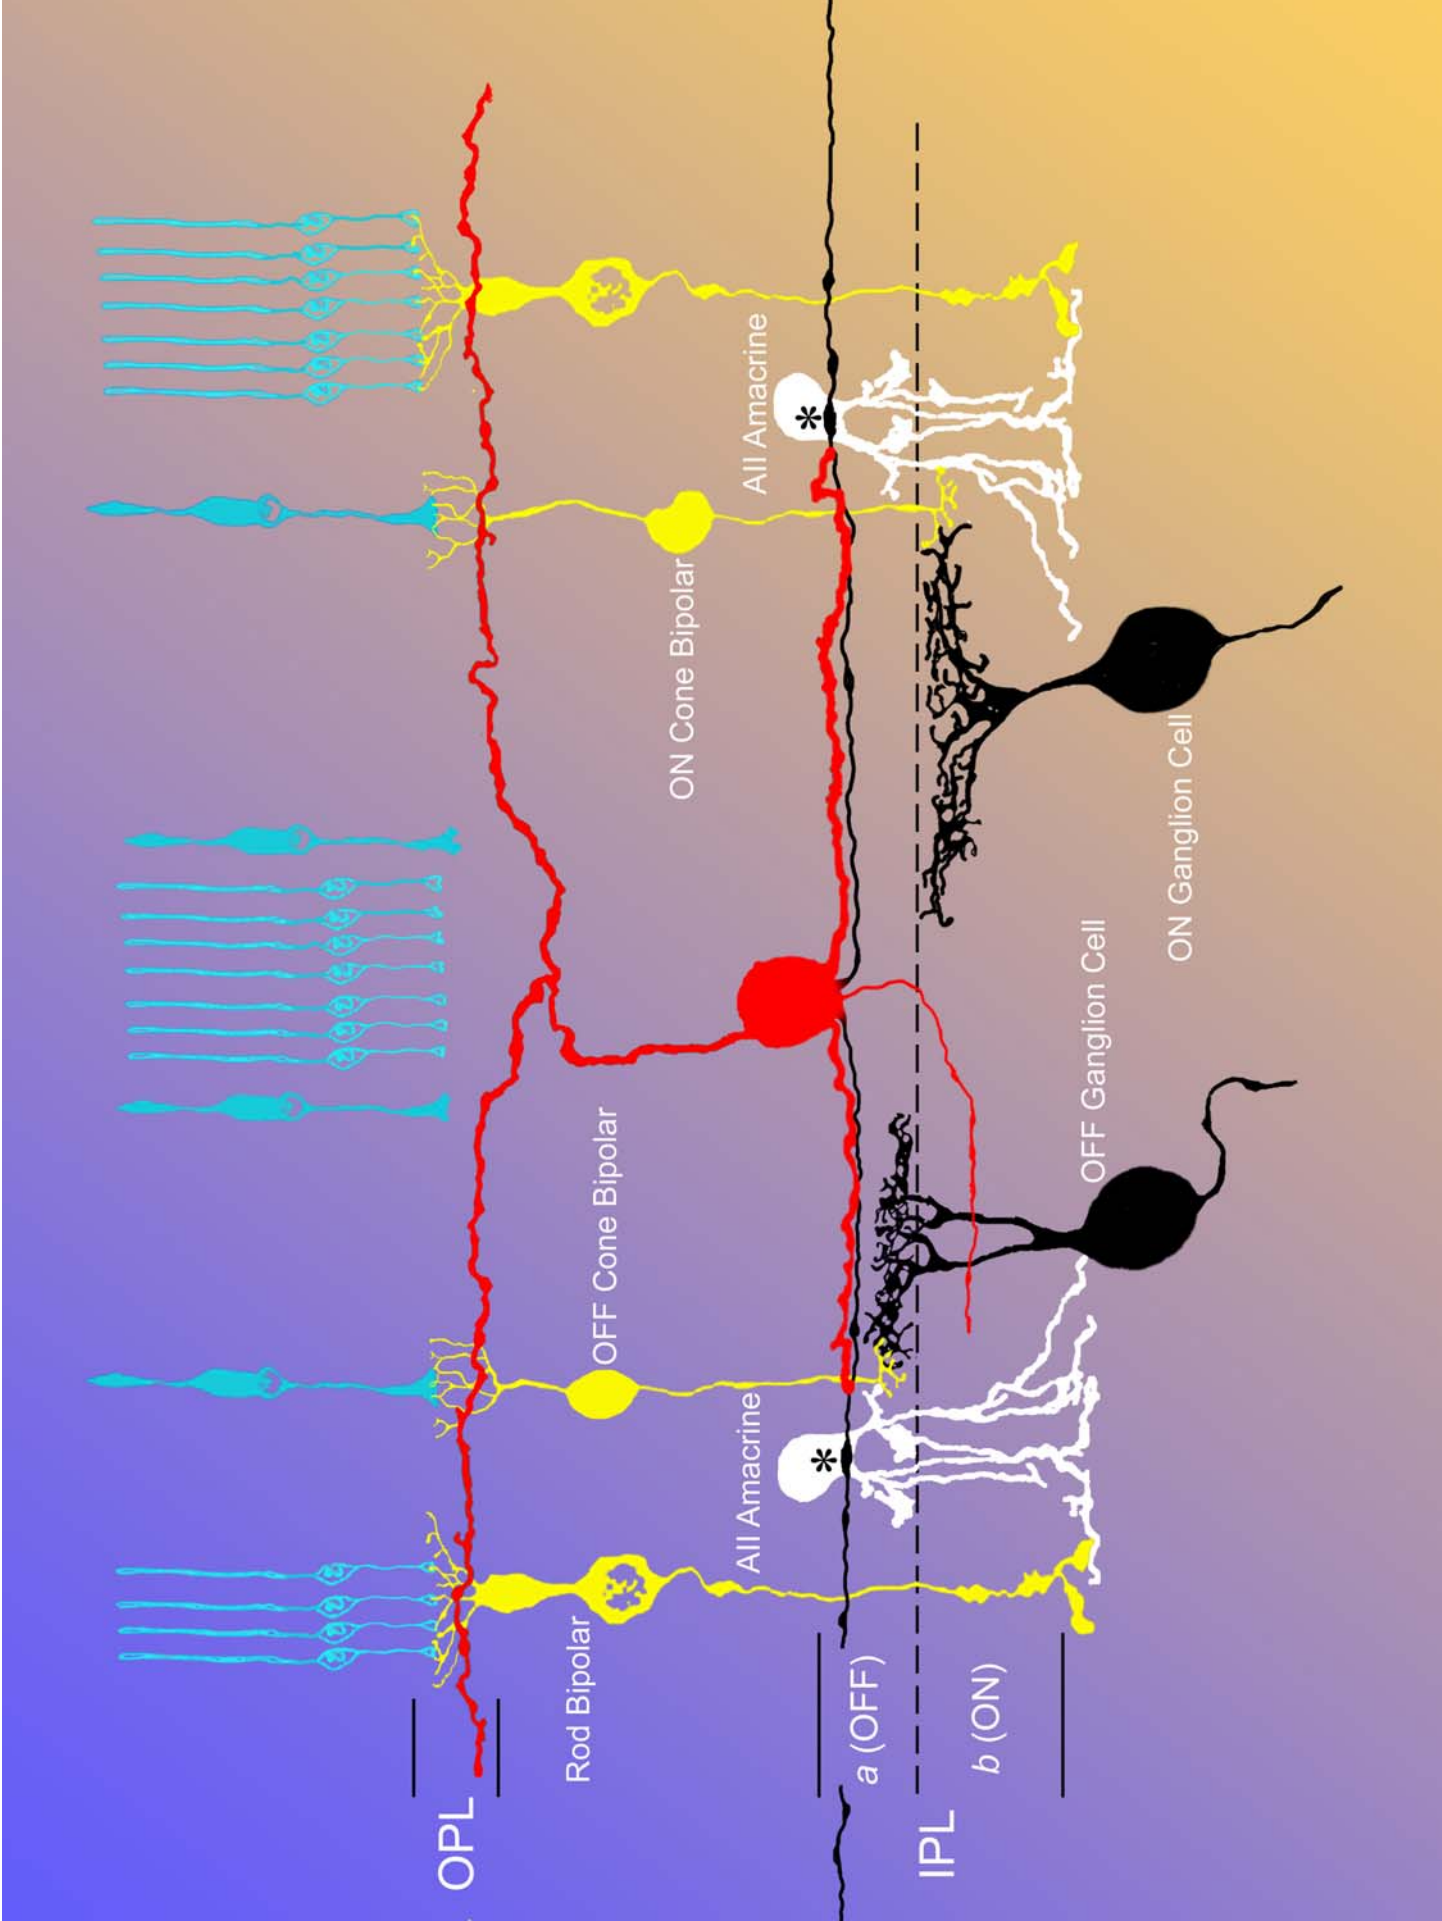

Supplement: 00130.2009_1.pdf [file 00130.2009_1.pdf]

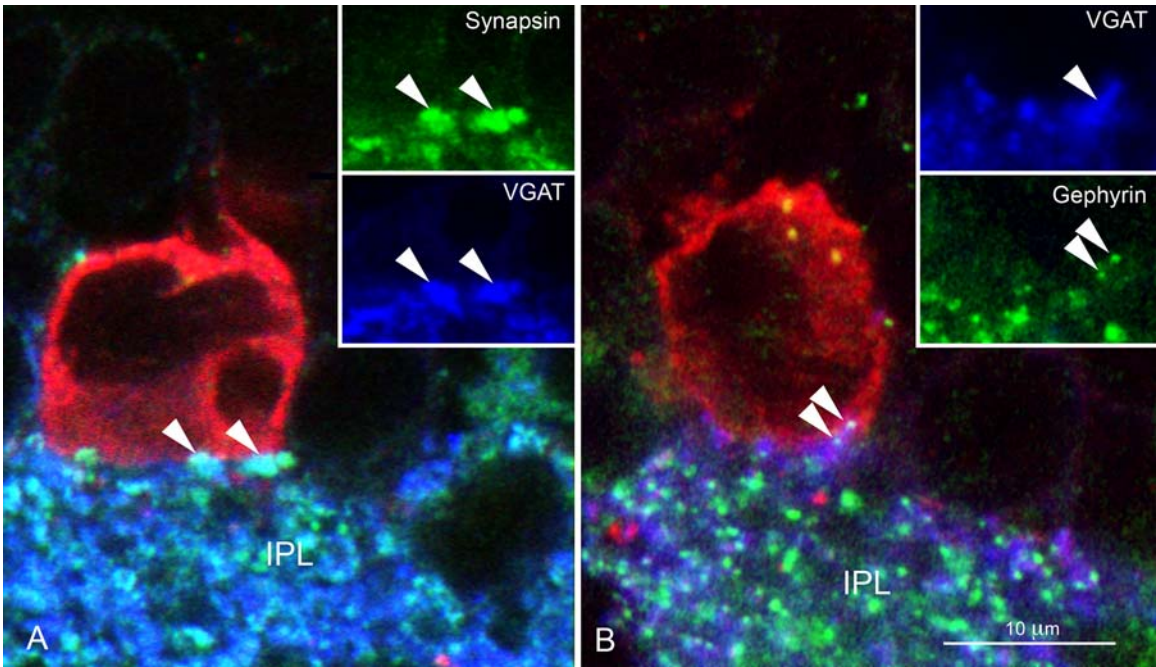

Supplement: 00130.2009_2.pdf [file 00130.2009_2.pdf]

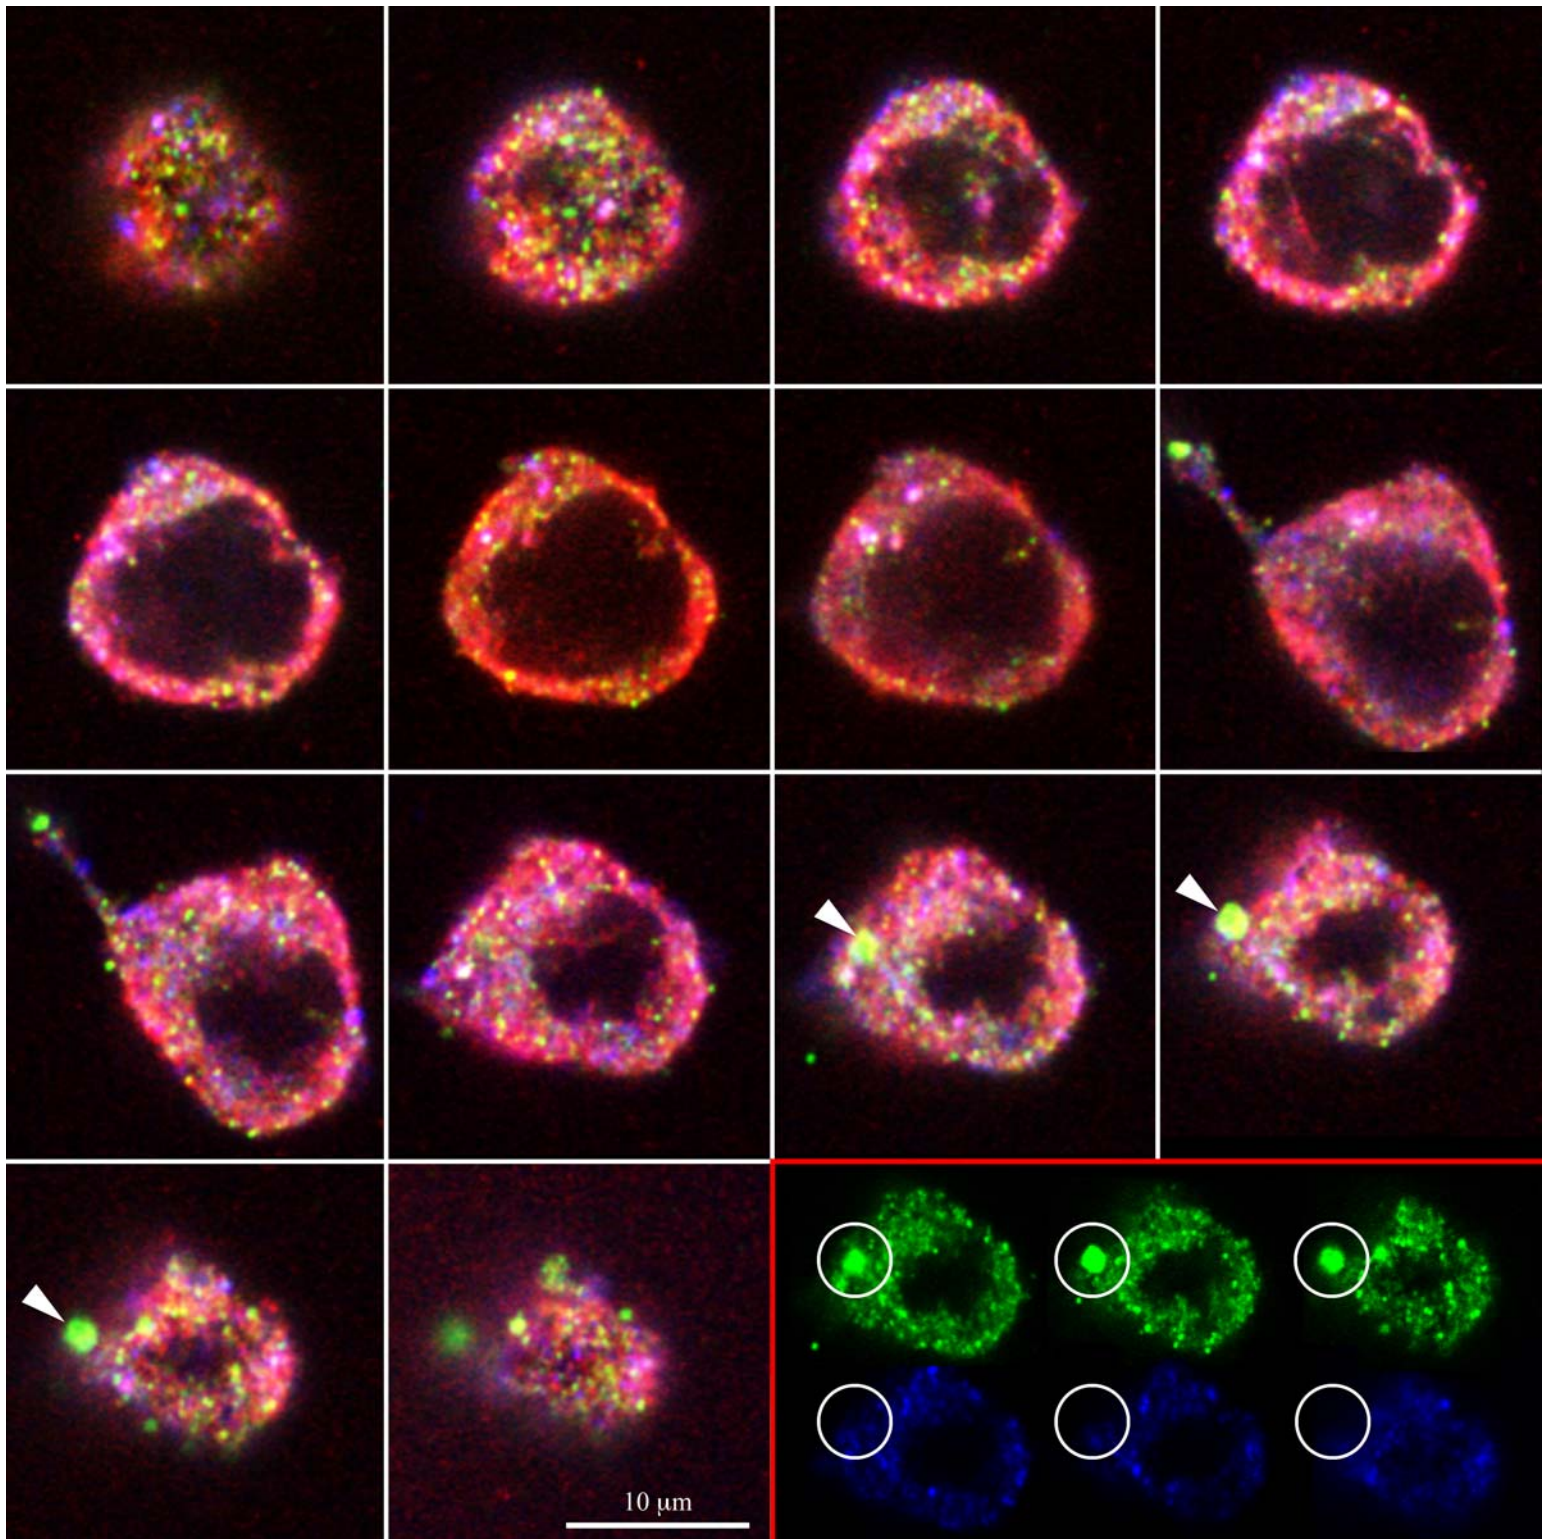

Supplement: 00130.2009_3.pdf [file 00130.2009_3.pdf]

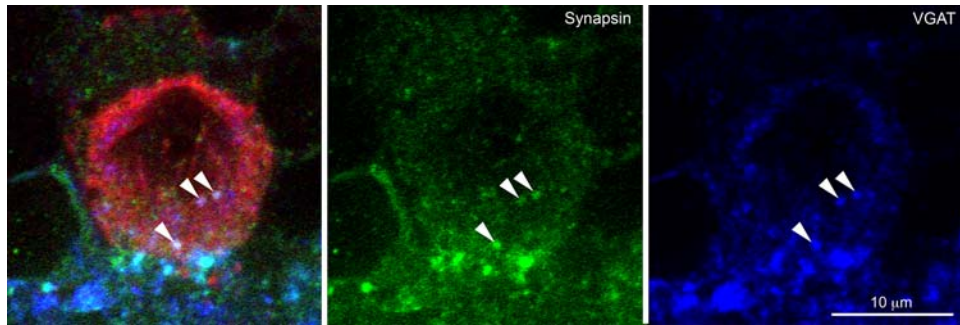

Supplement: 00130.2009_4.pdf [file 00130.2009_4.pdf]

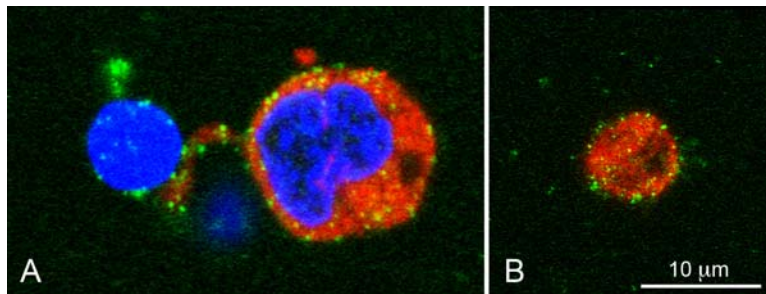

Supplement: 00130.2009_5.pdf [file 00130.2009_5.pdf]

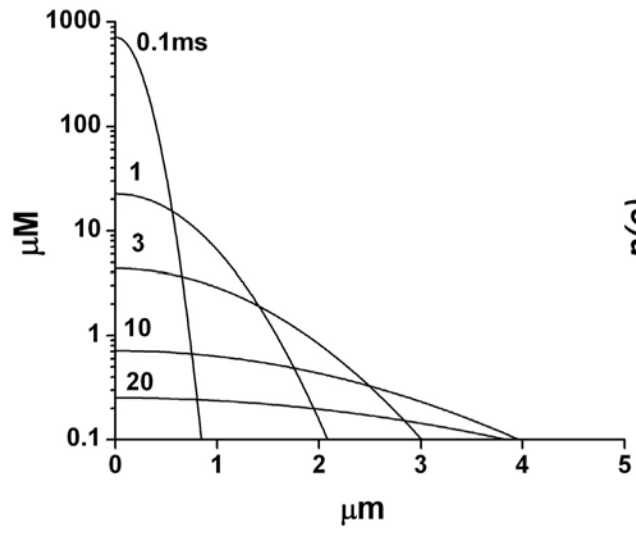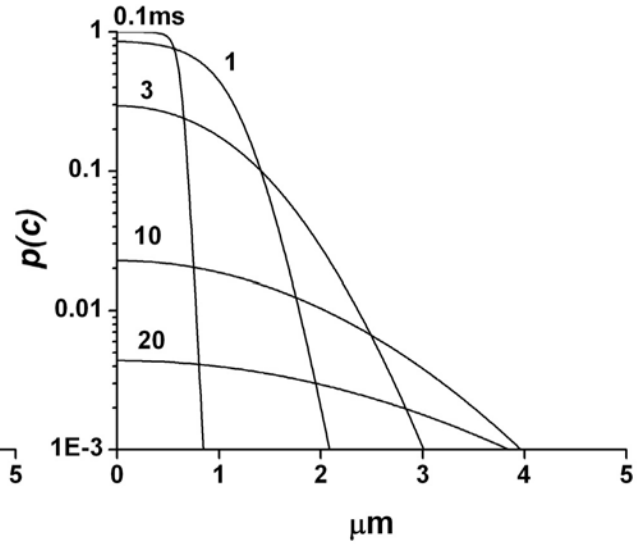

Supplement: 00130.2009_6.pdf [file 00130.2009_6.pdf]
